# Supplementary material for: DNA bar coding and pyrosequencing to analyze adverse events in therapeutic gene transfer
Source: PubMed Central journal article supplement — Nucleic Acids Res. 2008 Apr 14;36(9):e49. doi: 10.1093/nar/gkn125 (PMC2396413; doi:10.1093/nar/gkn125), 2008-04-14

**Supplementary Table 2. Lymphocyte characteristics in the organs of Rag-1 mice treated by gene therapy.**

| <b>Mouse 1</b><br>(4 months after gene transfer)                                        | PBL<br>cell/mm <sup>3</sup> | Thymus<br>x10 <sup>6</sup> cells                   | Spleen<br>x10 <sup>6</sup> cells | Lymph<br>nodes<br>x10 <sup>6</sup> cells | Bone marrow<br>x10 <sup>6</sup> cells |
|-----------------------------------------------------------------------------------------|-----------------------------|----------------------------------------------------|----------------------------------|------------------------------------------|---------------------------------------|
| Cell number                                                                             | 3 100                       | 12.6                                               | 20                               | 18                                       | 36                                    |
| T lymphocytes<br>CD4 <sup>+</sup> CD3 <sup>+</sup><br>CD8 <sup>+</sup> CD3 <sup>+</sup> | 14%<br>8%                   | 7%<br>3.8%<br>78%CD8 <sup>+</sup> CD4 <sup>+</sup> | 34%<br>8%                        | 32%<br>18%                               | 1%<br>2%                              |
| B lymphocytes<br>B220 <sup>+</sup><br>B220 <sup>+</sup> IgM <sup>+</sup>                | 11%<br>7%                   | ND                                                 | 35%<br>28%                       | 40%<br>32%                               | 5%<br>1%                              |
| hRAG-1 (copy/cell)                                                                      | ND                          | 8.9                                                | 9                                | 15                                       | 6.5                                   |
| hRAG-1 expression (%)                                                                   | ND                          | 37                                                 | 12.5                             | 13                                       | 24                                    |

| <b>Mouse X</b><br>(6 months after gene transfer)                                        | PBL<br>cell/mm <sup>3</sup> | Thymus<br>x10 <sup>6</sup> cells                                                          | Spleen<br>x10 <sup>6</sup> cells | Lymph<br>nodes<br>x10 <sup>6</sup> cells | Bone marrow<br>x10 <sup>6</sup> cells                | Liver |
|-----------------------------------------------------------------------------------------|-----------------------------|-------------------------------------------------------------------------------------------|----------------------------------|------------------------------------------|------------------------------------------------------|-------|
| Cell number                                                                             | 6 000                       | 0.7                                                                                       | 510                              | 0,5                                      | 19                                                   | ND    |
| T lymphocytes<br>CD4 <sup>+</sup> CD3 <sup>+</sup><br>CD8 <sup>+</sup> CD3 <sup>+</sup> | 21%<br>18%                  | 5%<br>18%<br>80%CD8 <sup>+</sup> CD3 <sup>-</sup><br>10%CD8 <sup>+</sup> CD4 <sup>+</sup> | 0%<br>0%                         | 52%<br>18%                               | 3%<br>3%<br>50%<br>CD4 <sup>+</sup> CD8 <sup>+</sup> | ND    |
| B lymphocytes<br>B220 <sup>+</sup><br>B220 <sup>+</sup> IgM <sup>+</sup>                | 24%<br>20%                  | ND                                                                                        | 2%<br>1.5%                       | 17%<br>12.5%                             | 6%<br>3.8%                                           | ND    |
| hRAG-1 (copy/cell)                                                                      | ND                          | 5                                                                                         | 25                               | 8                                        | 15                                                   | 23    |
| hRAG-1 expression (%)                                                                   | ND                          | ND                                                                                        | 3.5                              | ND                                       | 5.8                                                  | 2.6   |

| <b>Mouse 215</b><br>(6 months after secondary transplantation)                          | PBL<br>cell/mm <sup>3</sup> | Thymus<br>x10 <sup>6</sup> cells                                              | Spleen<br>x10 <sup>6</sup> cells | Lymph nodes<br>x10 <sup>6</sup> cells | Bone marrow<br>x10 <sup>6</sup> cells |
|-----------------------------------------------------------------------------------------|-----------------------------|-------------------------------------------------------------------------------|----------------------------------|---------------------------------------|---------------------------------------|
| Cell number                                                                             | 22 200                      | 45                                                                            | 310                              | 630                                   | 12                                    |
| T lymphocytes<br>CD4 <sup>+</sup> CD3 <sup>+</sup><br>CD8 <sup>+</sup> CD3 <sup>+</sup> | 2%<br>1%                    | 7%<br>13%<br>0%<br>CD8 <sup>+</sup> CD4 <sup>+</sup><br>95% CD44 <sup>+</sup> | 7%<br>2%                         | 12%<br>4%                             | 2%<br>2%                              |
| B lymphocytes<br>B220 <sup>+</sup><br>B220 <sup>+</sup> IgM <sup>+</sup>                | 60%<br>1%                   | ND                                                                            | 76%<br>2%                        | 60%<br>1%                             | 18%<br><1%                            |
| hRAG-1 (copy/cell)                                                                      | ND                          | 8                                                                             | 10                               | 9                                     | 1                                     |
| hRAG-1 expression (%)                                                                   | ND                          | 5.8                                                                           | 5.2                              | 8.2                                   | 1.8                                   |

ND = not done

Cytologic analysis was performed on spleen cells from mouse X (A) and mouse 215 (B). May Grünwald-Giemsa staining was performed on cytospin slides. Images were visualized using a Leica DM :RB microscope equipped with a 40X/0.7 objective lens and a Leica 350F camera (Leica, Wetzlar, Germany).

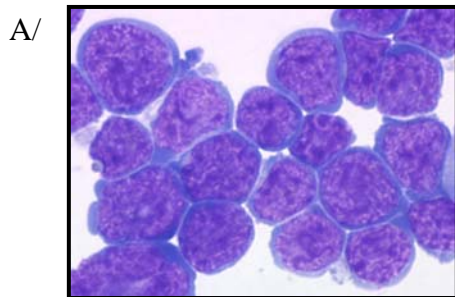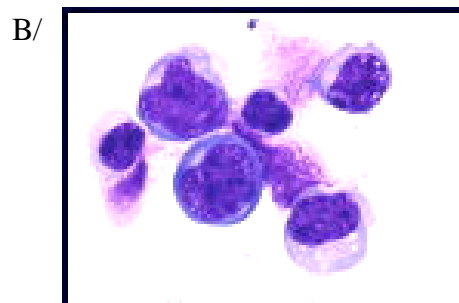

Supplement: gkn125_6.pdf [file gkn125_6.pdf]
