# Supplementary material for: DNA bar coding and pyrosequencing to analyze adverse events in therapeutic gene transfer
Source: PubMed Central journal article supplement — Nucleic Acids Res. 2008 Apr 14;36(9):e49. doi: 10.1093/nar/gkn125 (PMC2396413; doi:10.1093/nar/gkn125), 2008-04-14
Supplement: gkn125_5.pdf [file gkn125_5.pdf]

## lenti samples

### first round PCR

linker primer  
MKL-3

### Primer Name

MseL1  
MKL-3

### Primer sequence

GTAATACGACTCACTATAGGGC  
CTTAAGCCTCAATAAAGCTTGCCTTGAG

### second round PCR

GW3  
B-HIV-GWXX

GW-3 **gcctccctcgcgccatcag**AGGGCTCCGCTTAAGGGAC  
see below for barcoded primer

### (Author-vector-mouse-tissue)

| Quadrant 2 | Samples                               | Primer Name | Primer sequence                                               |
|------------|---------------------------------------|-------------|---------------------------------------------------------------|
| 1          | Wang-lentiEF1art-mouse31d-Sca1        | B-HIV-GW11  | gccttgccagcccgcctcag <b>cacg</b> AGACCCTTTTAGTCAGTGTGGAAAATC  |
| 2          | Wang-lentiEF1art-mouse31d-ganglion    | B-HIV-GW12  | gccttgccagcccgcctcag <b>cact</b> AGACCCTTTTAGTCAGTGTGGAAAATC  |
| 3          | Wang-lentiEF1art-mouse31d-spleen      | B-HIV-GW13  | gccttgccagcccgcctcag <b>cagc</b> AGACCCTTTTAGTCAGTGTGGAAAATC  |
| 10         | Wang-lentiEF1art-mouse22c-thymus      | B-HIV-GW20  | gccttgccagcccgcctcag <b>cgct</b> AGACCCTTTTAGTCAGTGTGGAAAATC  |
| 11         | Wang-lentiEF1art-mouse22c-LN          | B-HIV-GW21  | gccttgccagcccgcctcag <b>cgct</b> AGACCCTTTTAGTCAGTGTGGAAAATC  |
| 12         | Wang-lentiEF1art-mouse22c-spleen      | B-HIV-GW22  | gccttgccagcccgcctcag <b>cggtg</b> AGACCCTTTTAGTCAGTGTGGAAAATC |
| 13         | Wang-lentiEF1art-mouse22c-marrow      | B-HIV-GW23  | gccttgccagcccgcctcag <b>ctac</b> AGACCCTTTTAGTCAGTGTGGAAAATC  |
| Quadrant 3 | Samples                               | Primer Name | Primer sequence                                               |
| 4          | Wang-lentiEF1art-mouse8d-Sca1         | B-HIV-GW14  | gccttgccagcccgcctcag <b>cagt</b> AGACCCTTTTAGTCAGTGTGGAAAATC  |
| 5          | Wang-lentiEF1art-mouse8d-liver        | B-HIV-GW15  | gccttgccagcccgcctcag <b>catc</b> AGACCCTTTTAGTCAGTGTGGAAAATC  |
| 6          | Wang-lentiEF1art-mouse8d-spleen       | B-HIV-GW16  | gccttgccagcccgcctcag <b>catg</b> AGACCCTTTTAGTCAGTGTGGAAAATC  |
| 7          | Wang-lentiEF1art-mouse8d-thymus       | B-HIV-GW17  | gccttgccagcccgcctcag <b>cgac</b> AGACCCTTTTAGTCAGTGTGGAAAATC  |
| 8          | Wang-lentiEF1art-mouse8d-ganglion     | B-HIV-GW18  | gccttgccagcccgcctcag <b>cgag</b> AGACCCTTTTAGTCAGTGTGGAAAATC  |
| 9          | Wang-lentiEF1art-mouse8d-pleuralfluid | B-HIV-GW19  | gccttgccagcccgcctcag <b>cgat</b> AGACCCTTTTAGTCAGTGTGGAAAATC  |
| Quadrant 4 | Samples                               | Primer Name | Primer sequence                                               |
| 14         | Wang-lentiPGKart-mouse613d-Sca1       | B-HIV-GW24  | gccttgccagcccgcctcag <b>ctag</b> AGACCCTTTTAGTCAGTGTGGAAAATC  |
| 15         | Wang-lentiPGKart-mouse401c-thymus     | B-HIV-GW25  | gccttgccagcccgcctcag <b>ctat</b> AGACCCTTTTAGTCAGTGTGGAAAATC  |
| 16         | Wang-lentiPGKart-mouse401c-LN         | B-HIV-GW26  | gccttgccagcccgcctcag <b>ctcg</b> AGACCCTTTTAGTCAGTGTGGAAAATC  |
| 17         | Wang-lentiPGKart-mouse401c-spleen     | B-HIV-GW27  | gccttgccagcccgcctcag <b>ctgc</b> AGACCCTTTTAGTCAGTGTGGAAAATC  |
| 18         | Wang-lentiPGKart-mouse401c-marrow     | B-HIV-GW28  | gccttgccagcccgcctcag <b>ctgt</b> AGACCCTTTTAGTCAGTGTGGAAAATC  |

**retro samples**  
**first round PCR**

linker primer  
 KR-5

MseI1      GTAATACGACTCACTATAGGGC  
 KR-5        CCTCTTGCAGTTGCATCCGAC

**second round PCR**

GW3  
 B-MLV-GWXX

GW-3        **gcctccctcgcgccatcag**AGGGCTCCGCTTAAGGGAC  
 see below for barcoded primer

**(Author-vector-mouse-tissue)**

| Quadrant 1 | Samples                        | Primer Name | Primer sequence                                        |
|------------|--------------------------------|-------------|--------------------------------------------------------|
| 1          | Wang-retroRag-mouse215d-marrow | B-MLV-GW11  | gccttgccagcccgcctcag <b>cacg</b> TGATTGACTACCCGTCAGCGG |
| 2          | Wang-retroRag-mouse215d-thymus | B-MLV-GW12  | gccttgccagcccgcctcag <b>caga</b> TGATTGACTACCCGTCAGCGG |
| 3          | Wang-retroRag-mouse215d-spleen | B-MLV-GW13  | gccttgccagcccgcctcag <b>cata</b> TGATTGACTACCCGTCAGCGG |
| 4          | Wang-retroRag-mouse215d-LN     | B-MLV-GW14  | gccttgccagcccgcctcag <b>catg</b> TGATTGACTACCCGTCAGCGG |
| 5          | Wang-retroRag-mouseXd-marrow   | B-MLV-GW15  | gccttgccagcccgcctcag <b>cgag</b> TGATTGACTACCCGTCAGCGG |
| 6          | Wang-retroRag-mouseXd-spleen   | B-MLV-GW16  | gccttgccagcccgcctcag <b>cgca</b> TGATTGACTACCCGTCAGCGG |
| 7          | Wang-retroRag-mouseXd-liver    | B-MLV-GW17  | gccttgccagcccgcctcag <b>cgcg</b> TGATTGACTACCCGTCAGCGG |
| 8          | Wang-retroRag-mouse1c-thymus   | B-MLV-GW18  | gccttgccagcccgcctcag <b>cgta</b> TGATTGACTACCCGTCAGCGG |
| 9          | Wang-retroRag-mouse1c-LN       | B-MLV-GW19  | gccttgccagcccgcctcag <b>cgtg</b> TGATTGACTACCCGTCAGCGG |
| 10         | Wang-retroRag-mouse1c-marrow   | B-MLV-GW20  | gccttgccagcccgcctcag <b>ctag</b> TGATTGACTACCCGTCAGCGG |

NOTE: for barcoded primers in PCR2:

**all primers are 5' -> 3'**

**lower case black: primer B for 454 sequencing**

**red: 4-bp barcode**

**upper case black: LTR specific primer**
