# Supplementary material for: DNA bar coding and pyrosequencing to analyze adverse events in therapeutic gene transfer
Source: PubMed Central journal article supplement — Nucleic Acids Res. 2008 Apr 14;36(9):e49. doi: 10.1093/nar/gkn125 (PMC2396413; doi:10.1093/nar/gkn125), 2008-04-14
Supplement: gkn125_7.pdf [file gkn125_7.pdf]

**Table 3: Lymphocytes analysis in the organs of Artemis mice treated by gene therapy**

**Bone marrow Sca1+ cells from Artemis-deficient mice (Art-/-) were transduced by PGK-Art lentiviral vector and transplanted in Artemis-deficient mice after 3Gy irradiation**

**Mouse 613 was analysed 6 months after transplantation.**

|                                    | 5 Weeks PT | 15 Weeks PT | 25 Weeks PT |
|------------------------------------|------------|-------------|-------------|
| <b>PBL ( cells/mm<sup>3</sup>)</b> | 720        | 1400        | 1200        |
| <b>T lymphocytes</b>               |            |             |             |
| CD3+/CD4+ (%)                      | 10.4       | 16.2        | 6.3         |
| total CD3+/CD4+                    | 75.2       | 227.4       | 75.6        |
| CD3+/CD8+ (%)                      | 6.5        | 9.4         | 6.6         |
| total CD3+/CD8+                    | 46.6       | 131.6       | 79.2        |
| CD4+/CD8+ (%)                      | ND         | ND          | 0.3         |
| total CD4+/CD8+                    | ND         | ND          | 0.2         |
| CD3+/TCRb+ (%)                     | 17.4       | 27.4        | 14.6        |
| total CD3+/TCRb+                   | 125.5      | 383.6       | 11.6        |
| <b>B lymphocytes</b>               |            |             |             |
| B220+ /IgM+ (%)                    | 1.7        | 2.6         | 1.9         |
| total B220+ /IgM+                  | 12         | 36.4        | 22.8        |
| B220+ /IgD+ (%)                    | 0.8        | 2.6         | 1.9         |
| total B220+ /IgD+                  | 5.6        | 36.4        | 22.8        |
| <b>Myeloid cells</b>               |            |             |             |
| Gr1+ /Mac1+ (%)                    | ND         | <b>40</b>   | <b>41</b>   |
| total Gr1+ /Mac1+                  | ND         | 560         | 491.6       |
| Gr1- /Mac1+ (%)                    | ND         | 9           | ND          |
| total Gr1- /Mac1+                  | ND         | 126         | ND          |
| NK1.1+ (%)                         | ND         | 12.7        | ND          |
| total NK1.1+                       | ND         | 177.8       | ND          |

**25 Weeks PT**

|                      | Spleen              | Lymph nodes         | Thymus                    | BM                   |
|----------------------|---------------------|---------------------|---------------------------|----------------------|
|                      | 15.10 <sup>6</sup>  | 4.3.10 <sup>6</sup> | <b>312.10<sup>6</sup></b> | 31.5.10 <sup>6</sup> |
| <b>T lymphocytes</b> |                     |                     |                           |                      |
| CD3+/CD4+ (%)        | 18.7                | 42.3                | 4                         | 1                    |
| total CD3+/CD4+      | 2.8.10 <sup>6</sup> | 1.8.10 <sup>6</sup> | 12.5.10 <sup>6</sup>      | 3.1.10 <sup>5</sup>  |
| CD3+/CD8+ (%)        | 11.6                | 41.7                | 3.9                       | 1.4                  |
| total CD3+/CD8+      | 1.7.10 <sup>6</sup> | 1.8.10 <sup>6</sup> | 12.3.10 <sup>6</sup>      | 4.2.10 <sup>5</sup>  |
| CD4+/CD8+ (%)        | 0.5                 | 0.9                 | <b>96.8</b>               | 0.3                  |
| total CD4+/CD8+      | 7.5.10 <sup>4</sup> | 3.9.10 <sup>4</sup> | 302.10 <sup>6</sup>       | 7.9.10 <sup>4</sup>  |
| CD3+/TCRb+ (%)       |                     | 83                  | 4.2                       |                      |
| total CD3+/TCRb+     |                     | 3.6.10 <sup>6</sup> | 13.10 <sup>6</sup>        |                      |
| <b>B lymphocytes</b> |                     |                     |                           |                      |

|                      |                  |                  |     |                  |
|----------------------|------------------|------------------|-----|------------------|
| B220+ /IgM+ (%)      | 23.2             | 8.2              |     | 0.5              |
| total B220+ /IgM+    | $3.5 \cdot 10^6$ | $3.5 \cdot 10^5$ |     | $1.6 \cdot 10^5$ |
| B220+ /IgD+ (%)      | 19.2             | 7.4              |     | 0.5              |
| total B220+ /IgD+    | $2.9 \cdot 10^6$ | $3.2 \cdot 10^5$ |     | $1.6 \cdot 10^5$ |
| <b>Myeloid cells</b> |                  |                  |     |                  |
| Gr1+ /Mac1+ (%)      | 1.5              |                  |     | 45.2             |
| total Gr1+ /Mac1+    | $2.2 \cdot 10^5$ |                  |     | $1.4 \cdot 10^7$ |
| Chimerism (%)        |                  | 58               | 56  | 7                |
| PGK-Art (copy/cell)  |                  | 0.3              | 0.9 | 0.05             |

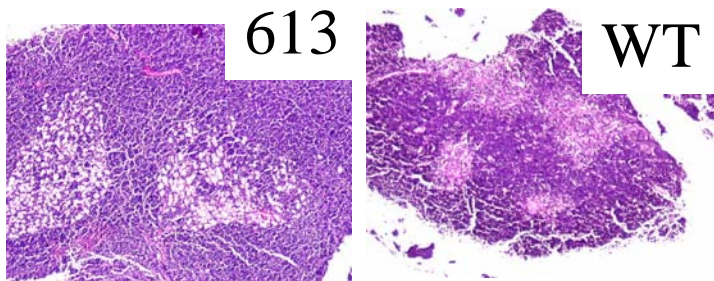

Immunohistochemical staining performed on thymus section demonstrated the disturbed architecture of this organ

**Bone marrow Sca1<sup>+</sup> cells from Artemis-deficient mice (Art<sup>-/-</sup>) were transduced by EF1 $\alpha$ -Art lentiviral vector and transplanted in Artemis-deficient mice after 5Gy irradiation**

**Mouse 8 was analysed 9 months after transplantation.**

|                                           | 5 Weeks PT | 15 Weeks PT | 25 Weeks PT |
|-------------------------------------------|------------|-------------|-------------|
| <b>PBL</b> ( cells/mm <sup>3</sup> )      | 1440       | 1260        | 1000        |
| <b>T lymphocytes</b>                      |            |             |             |
| CD3 <sup>+</sup> /CD4 <sup>+</sup> (%)    | 6.9        | 19.3        | 2.6         |
| total CD3 <sup>+</sup> /CD4 <sup>+</sup>  | 99.5       | 243.2       | 25.5        |
| CD3 <sup>+</sup> /CD8 <sup>+</sup> (%)    | 5.1        | 13.3        | 1.9         |
| total CD3 <sup>+</sup> /CD8 <sup>+</sup>  | 72.7       | 167.6       | 18.8        |
| CD4 <sup>+</sup> /CD8 <sup>+</sup> (%)    | ND         | ND          | ND          |
| total CD4 <sup>+</sup> /CD8 <sup>+</sup>  | ND         | ND          | ND          |
| CD3 <sup>+</sup> /TCRb <sup>+</sup> (%)   | 11.9       | 30.9        | 6.4         |
| total CD3 <sup>+</sup> /TCRb <sup>+</sup> | 171.9      | 388.7       | 64.1        |
| <b>B lymphocytes</b>                      |            |             |             |
| B220 <sup>+</sup> /IgM <sup>+</sup> (%)   | 3          | 8.6         | 0.7         |
| total B220 <sup>+</sup> /IgM <sup>+</sup> | 42.5       | 108.4       | 6.9         |
| B220 <sup>+</sup> /IgD <sup>+</sup> (%)   | 2.8        | 8.6         | 0.7         |
| total B220 <sup>+</sup> /IgD <sup>+</sup> | 40.3       | 108.4       | 6.6         |
| <b>Myeloid cells</b>                      |            |             |             |
| Gr1 <sup>+</sup> /Mac1 <sup>+</sup> (%)   | ND         | <b>38</b>   | 4.4         |
| total Gr1 <sup>+</sup> /Mac1 <sup>+</sup> | ND         | 478.8       | 44.2        |
| Gr1 <sup>-</sup> /Mac1 <sup>+</sup> (%)   | ND         | 34.8        | 6.4         |
| total Gr1 <sup>-</sup> /Mac1 <sup>+</sup> | ND         | 438.5       | 64.4        |
| NK1.1 <sup>+</sup> (%)                    | ND         | 0.2         | 0.9         |
| total NK1.1 <sup>+</sup>                  | ND         | 1.9         | 8.7         |

|                     | Spleen | liver | Lymph nodes | Thymus | Ascite |
|---------------------|--------|-------|-------------|--------|--------|
| Chimerism (%)       | 71     | 64    | 100         | 97     | 95     |
| PGK-Art (copy/cell) | 3      | 3     | 1.9         | 2.1    | 2      |

**Mouse 31 was analysed 4 months after transplantation.**

|                                      | <b>5 Weeks PT</b> | <b>15 Weeks PT</b> |
|--------------------------------------|-------------------|--------------------|
| <b>PBL</b> ( cells/mm <sup>3</sup> ) | 2880              | 1240               |
| <b>T lymphocytes</b>                 |                   |                    |
| CD3+/CD4+ (%)                        | 15.5              | 19.8               |
| total CD3+/CD4+                      | 446.4             | 245.5              |
| CD3+/CD8+ (%)                        | 5.7               | 13.8               |
| total CD3+/CD8+                      | 162.7             | 171.1              |
| CD4+/CD8+ (%)                        | ND                | ND                 |
| total CD4+/CD8+                      | ND                | ND                 |
| CD3+/TCRb+ (%)                       | 21.5              | 31.2               |
| total CD3+/TCRb+                     | 619.2             | 386.9              |
| <b>B lymphocytes</b>                 |                   |                    |
| B220+ /IgM+ (%)                      | 1.9               | 6.9                |
| total B220+ /IgM+                    | 54.7              | 85.6               |
| B220+ /IgD+ (%)                      | 2.4               | 6.6                |
| total B220+ /IgD+                    | 69.1              | 81.8               |
| <b>Myeloid cells</b>                 |                   |                    |
| Gr1+ /Mac1+ (%)                      | ND                | <b>33.4</b>        |
| total Gr1+ /Mac1+                    | ND                | 413.5              |
| Gr1- /Mac1+ (%)                      | ND                | <b>23.4</b>        |
| total Gr1- /Mac1+                    | ND                | 290.2              |
| NK1.1+ (%)                           | ND                | <b>35</b>          |
| total NK1.1+                         | ND                | 434                |

|                        | <b>Spleen</b> | <b>Lymph nodes</b> |
|------------------------|---------------|--------------------|
| Chimerism (%)          | 47            | 44                 |
| PGK-Art<br>(copy/cell) | 1.4           | 3.5                |

PT = post-transplantation  
PBL = peripheral blood cells  
ND = Not done

The chimerism is calculated as followed: % donor cells/%recipient cells
